# Supplementary material for: Analysis of Transcriptional Responses of the Inflorescence Meristems in Jatropha curcas Following Gibberellin Treatment
Source: MDPI journal article supplement (doi:10.3390/ijms19020432), 2018-02-01
Supplement: s1 [file Supplementary Tables.xlsx]

## Sheet: Table S1
Table S1. The information about statistics of RNA-seq alignment
Sample name	Raw reads	Clean reads	Clean bases	Error rate(%)	Q20(%)	Q30(%)	GC content(%)
T0_1	46641650	44763156	6.71G	0.01	97.55	93.77	42.84
T0_2	50587958	48601324	7.29G	0.01	97.61	94.01	42.49
CK6_1	46542806	45144054	6.77G	0.01	97.9	94.85	43
CK6_2	45479214	43767538	6.57G	0.01	97.81	94.59	43.09
CK12_1	49330156	47562102	7.13G	0.01	97.74	94.48	42.31
CK12_2	48511038	47062642	7.06G	0.01	97.72	94.08	43.17
CK24_1	43955200	42465116	6.37G	0.01	97.76	94.31	42.96
CK24_2	46505052	44346880	6.65G	0.01	97.61	93.89	43.09
CK48_1	43500910	42285984	6.34G	0.01	97.82	94.68	42.53
CK48_2	72348042	69701414	10.46G	0.01	97.78	94.52	42.4
T6_1	43481692	41790950	6.27G	0.01	97.68	94.33	42.68
T6_2	45263722	43432494	6.51G	0.01	97.75	94.27	43.11
T12_1	55445992	53414090	8.01G	0.01	97.48	93.88	42.43
T12_2	47243624	45693760	6.85G	0.01	97.56	93.78	43.16
T24_1	50097568	48536086	7.28G	0.01	97.66	94.34	41.82
T24_2	64180068	61691378	9.25G	0.01	97.89	94.78	42.76
T48_1	47590856	45767224	6.87G	0.01	97.74	94.44	42.81
T48_2	43691670	42025270	6.30G	0.01	97.72	94.15	43.09

## Sheet: Table S2
Table S2. The information about the RNA-seq data mapped with the genome of J.curcas
Items	Clean reads	Total mapped	Multiple mapped	Uniquely mapped	Non-splice reads	Splice reads
T0_1	44763156	39661061 (88.6%)	785307 (1.75%)	38875754 (86.85%)	25521564 (57.01%)	13354190 (29.83%)
T0_2	48601324	43534298 (89.57%)	826912 (1.70%)	42707386 (87.87%)	29503558 (60.71%)	13203828 (27.17%)
CK6_1	45144054	39432906 (87.35%)	737741 (1.63%)	38695165 (85.71%)	25080331 (55.56%)	13614834 (30.16%)
CK6_2	43767538	37542392 (85.78%)	765569 (1.75%)	36776823 (84.03%)	23670323 (54.08%)	13106500 (29.95%)
CK12_1	47562102	41581204 (87.43%)	807063 (1.70%)	40774141 (85.73%)	27690232 (58.22%)	13083909 (27.51%)
CK12_2	47062642	42686083 (90.7%)	748097 (1.59%)	41937986 (89.11%)	26072265 (55.4%)	15865721 (33.71%)
CK24_1	42465116	37942603 (89.35%)	792366 (1.87%)	37150237 (87.48%)	24608932 (57.95%)	12541305 (29.53%)
CK24_2	44346880	39632243 (89.37%)	728086 (1.64%)	38904157 (87.73%)	25880483 (58.36%)	13023674 (29.37%)
CK48_1	42285984	36679268 (86.74%)	841230 (1.99%)	35838038 (84.75%)	24778468 (58.60%)	11059570 (26.15%)
CK48_2	69701414	43577093 (62.52%)	866970 (1.24%)	42710123 (61.28%)	28089258 (40.30%)	14620865 (20.98%)
T6_1	41790950	36147249 (86.50%)	785952 (1.88%)	35361297 (84.61%)	23800542 (56.95%)	11560755 (27.66%)
T6_2	43432494	39202661 (90.26%)	755127 (1.74%)	38447534 (88.52%)	24374322 (56.12%)	14073212 (32.40%)
T12_1	53414090	46496521 (87.05%)	915122 (1.71%)	45581399 (85.34%)	30960523 (57.96%)	14620876 (27.37%)
T12_2	45693760	41242520 (90.26%)	756659 (1.66%)	40485861 (88.60%)	25549838 (55.92%)	14936023 (32.69%)
T24_1	48536086	42411779 (87.38%)	869185 (1.79%)	41542594 (85.59%)	29629034 (61.05%)	11913560 (24.55%)
T24_2	61691378	54385674 (88.16%)	1091495 (1.77%)	53294179 (86.39%)	35697587 (57.86%)	17596592 (28.52%)
T48_1	45767224	40246655 (87.94%)	828795 (1.81%)	39417860 (86.13%)	26088831 (57.00%)	13329029 (29.12%)
T48_2	42025270	38391458 (91.35%)	653289 (1.55%)	37738169 (89.8%)	24037782 (57.20%)	13700387 (32.60%)

## Sheet: Table S3
Table S3. The primers of qRT-PCR used for validation of expression trend after GA3 treatment
Gene ID	Forward Primers	Reverse Primers	Product size(bp)
JC01849	AGCAATGTCTTTTATCCTTCTCTATTT	TTCTGCACTTGTAGATTCTTAAATTATA	198
JC02272	AAGGACAAGAATCACCTCCCAACT	TCACAAATGCTGCACTCAAACTC	169
JC02534	GATTGCATCTCAGATCCAGGGTT	TGAACATATCACCAGTGCCAGC	116
JC02934	TGGAATGAAGGAGTTGTTGGTGCTA	ACCCGTGGACCATCCCAGTAAAT	260
JC04619	ACCCACAAAATTTCCGTTCTGCA	TCGCTCTTCTCATCGCTTACCAG	145
JC06413	TAGAGGAAGTTCGGAAGGCACAG	AGCATCCAATGAAGGAGCCATAT	269
JC06540	AGGTACTATCACCCTCTTGCTTC	GTGGATAAACTATTGCCTCTGGT	248
JC08238	CATTGCCATCATCTGTCCTATCT	CAGCGGATCTAAGTCACTAATACC	275
JC08881	TTCACGCAGGCATTACTACTCATA	GTGTTGGCAATTCTTCCAGGAATAA	136
JC08882	CTATGGCATCGGTGGTGGTATTG	ATCCCAGAGTCGTTAAGTGCTTTCT	175
JC08884	CTTTAGCAAGGTGGGCAATTCAA	GTAAACACTCAGCCGCACTCGTA	177
JC08888	ACTAATGGGAGATAATTTACTAGGACG	ATCCGAATTGAACTACTGGTTGG	203
JC10078	CAGATAAACGAAAGGAACTTGTTGG	CGAAAGGTGGTGACTCGCAGAT	301
JC11710	CTCTTCGTCTACTTCCTCTTCAAACT	TTCGCCACCTTGGACCATACG	328
JC11754	CATGAATCACAGGGCAACTACCAGG	TCCCATGCGAGTCGAAGAGGAAT	140
JC12153	CTCTGGTTATTTTCGCTAGTTCC	AGTCCATTTTCAAGGGCTTCCTC	136
JC12650	AGTTTTAGGTTCAGTTTTCTTTGTGT	GCCATAGTCAAGATTGAGGAGCG	82
JC12669	TCGGCTGCTTCCACTTCTACCC	TCCTCTCCTTTGTAGTACCCATCAC	224
JC13342	TGAATTTGGATGGATGCAGGAAG	CACAAGTTCTCAACAAGCAGGTC	298
JC13660	CATTGATGAGATGAGGAGTCTGGAG	TGGAGGCGGAAAGCATAAAGG	270
JC14204	CTGTGAAAGAGCTAAAGAGGCACA	GAGTTTGTATTGGGATTTTTAGGCATC	189
JC14244	ATTGCGGGTTGGGGTTAGGCGTCTT	ATAAACTGGCTTGTCCTCGGTTTGT	165
JC14274	TACGGAGACACCATAGGCACCAG	ACTTCCCTGACACTTCCAATCCC	196
JC15882	GATTGATAACATTACAGCAAGGCAAGT	AACCTCAGCATCGCAAAGAACAG	100
JC16280	AGCGTGTCACTGACCCTTCTATC	GCAATCCACCGCTGTAGTAATCAA	213
JC17700	AATCGTCGGAGTCAAATTCTTCG	GCTAAAGCTGCCGCCTCTGC	199
JC17975	CTCTGATAATGTCCCTGAAACGC	TCCTAAATCCTGTCCAACTACGG	233
JC17987	CTGAACGAAGCAAATAAGACCCTG	TCACACTCCAATGGATGAAAGAAAC	152
JC18282	GCTGTTGGCACTGTTAAGAGGTAT	CAGGGTGTCGGTTAGTATAGTAAGG	199
JC19628	GAGATGTTCAAGTTTAGGCAAGA	TCACAAGGAATAGTAAGCCCCAT	216
JC20657	CTCTTAGTCGCCTTTGTGCTTAT	AACTTTGGAATTGGGCTTACCTG	166
JC21273	CAACGATGGAACAATTCGCTAT	GTGAGGAAGTCGCTGTCAGTATG	208
JC21298	CTGGGTTTGTGGCTTCTTTGC	TACTCCTTGGATTGCTGGCTTTA	278
JC22004	CAAATGAGAACTGAATCGGAGCAA	ATCCAAACCAGCCACAACAACTA	198
JC22124	TGAGCCAATCCCAAGCAGTCCAA	GAGGGCTACCAACGATGTCCACAAA	176
JC22745	AGGTAGCGAGTCTAACGAGTTCA	TATTTGTTATACTAAGCCTTTCGCC	281
JC23114	TCCCACCTTTACCTGTCTATTCT	TAGTCAGCCTTTCGTTGCGTTTC	279
JC23402	GGAATCTTGGATGAACAGTTTACTC	GAAATCTACAGTTTGCTGGTCTA	153
JC23499	CTGACCAAGAAACTGCTCCTCCT	ATTCTGACCCATTGTAGCCTTCC	270
JC25593	TGGGAAGGAGGTGAGCAAAGTAT	AGTTGTGGCTGTCATCTGGTCTG	138
JC26359	ATCAGGTGTTCAGGTACGCAAAG	CATACCAAATGGCTAAACGAGGA	261
Novel00351	CTTTCTGTTCTTTGCGATGCTG	GATTATACCTTGCGATTATGTCCT	109
Novel00596	GTTCCAGAAGATCCAGCACAAGA	TGAGGCACACAAATAAGTGGACC	318
Novel00988	TAATACCCAACATTCCAAGCACC	AAGCAACACTTGAAGTACCACACTA	122
Jcactin	CTCCTCTCAACCCCAAAGCCAA	CACCAGAATCCAGCACGATACCA	147
JcGAPDH	TGAAGGACTGGAGAGGTGGAAGAGC	ATCAACAGTTGGAACACGGAAAGCC	140
